# Supplementary material for: Native low-density lipoproteins are priming signals of the NLRP3 inflammasome/interleukin-1β pathway in human adipose tissue and macrophages
Source: PubMed Central journal article supplement (PMC10620147; doi:10.1038/s41598-023-45870-1), 2023-11-01

**Native low-density lipoproteins are priming signals of the NLRP3 inflammasome/  
interleukin-1 $\beta$  pathway in human adipose tissue and macrophages**

Simon Bissonnette<sup>1,2,3</sup>, Valérie Lamantia<sup>1,2,3</sup>, Benjamin Ouimet<sup>1,2</sup>, Yannick Cyr<sup>1,2,3</sup>, Marie Devaux<sup>1,2</sup>, Remi Rabasa-Lhoret<sup>1,2,3</sup>, Michel Chrétien<sup>1,2</sup>, Maya Saleh<sup>4,5</sup>, May Faraj<sup>1,2,3,4</sup>

<sup>1</sup> Faculty of Medicine, Université de Montréal, Montréal, Québec, <sup>2</sup> Institut de recherches cliniques de Montréal (IRCM), Montréal, Québec, <sup>3</sup> Montreal Diabetes Research Center (MDRC), Montréal, Québec, Ottawa, Ontario, <sup>4</sup> Faculty of Medicine, McGill University, Montréal, Québec, <sup>5</sup> University of Bordeaux, Bordeaux, France

**Supplemental Figure 1:** Pilot kinetic studies conducted in fasting white adipose tissue (WAT) of 4 subjects to optimize experimental conditions to be used for LPS and ATP as *priming* and *activation* positive controls of WAT NLRP3 inflammasome, respectively. Shown here is WAT IL-1 $\beta$ -secretion following incubation with (A) LPS concentration-curve for 6 hours followed by 5 mmol/L ATP for 20 min, N=1; (B) 1  $\mu$ g/mL LPS time-curve followed by 5 mmol/L ATP for 20 min, N=1; (C) 0.3  $\mu$ g/ml LPS for 6 hours followed by ATP concentration-curve for 20 minutes, N=3; and (D) 0.3  $\mu$ g/ml LPS for 4 hours followed by 3 mmol/L ATP time-curve, N=2. Minimal LPS and ATP concentrations and incubation period that induced maximal WAT IL-1 $\beta$ -secretion were then used as positive controls for all experiments described in manuscript and were: **0.3  $\mu$ g/ml LPS for 4 hours followed by 3 mmol/L ATP for 3 hours** (highlighted in red rectangular below). N.B. LPS was used for 4 hours for practical reasons to account for the 8 hours needed to complete experiments in postprandial WAT (not included in this manuscript).

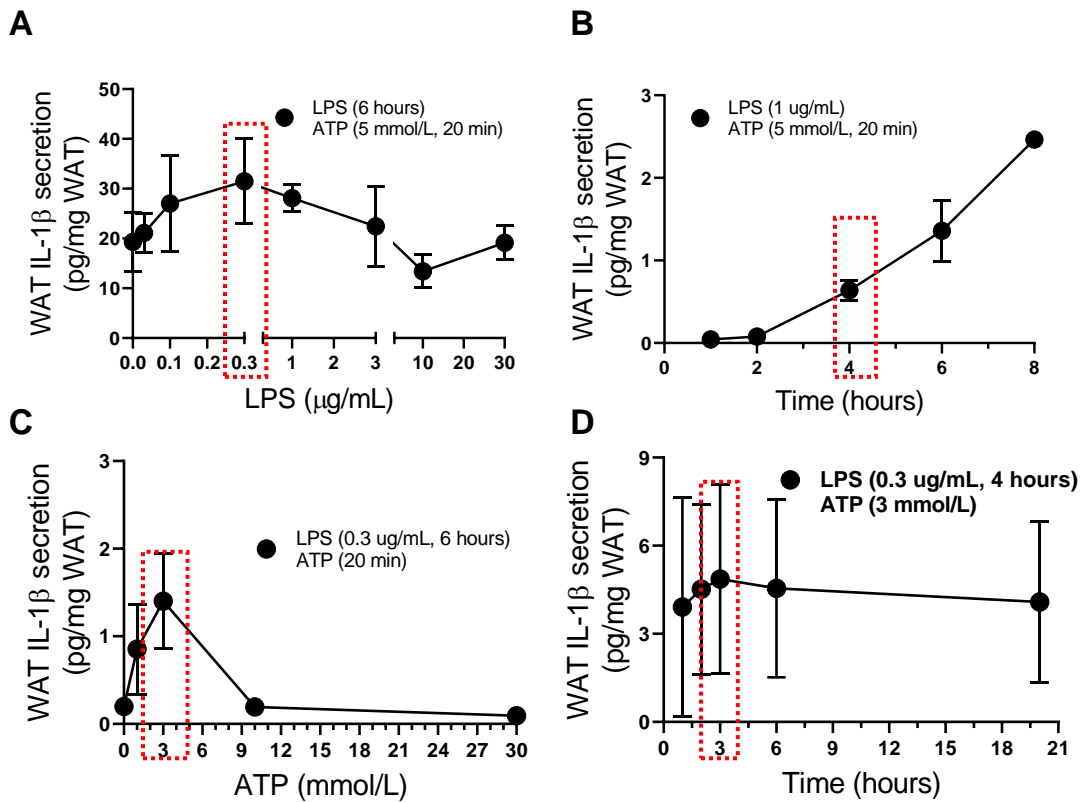

**Supplemental Figure 2:** Sex differences in fasting WAT IL-1 $\beta$ -secretion induced by 5% FBS medium/medium (baseline or negative control), LDL/LDL, medium/ATP, LDL/ATP, LPS/medium, LPS/LDL, or LPS/ATP (positive control) for the priming/activation periods of the NLRP3 inflammasome. Data was analyzed by mixed-model analysis with treatment and sex interaction as in methods and presented as average  $\pm$  SEM. N=23 women and N=11 men except with LDL/LDL, where N=21 women and N=11 men for missing data.

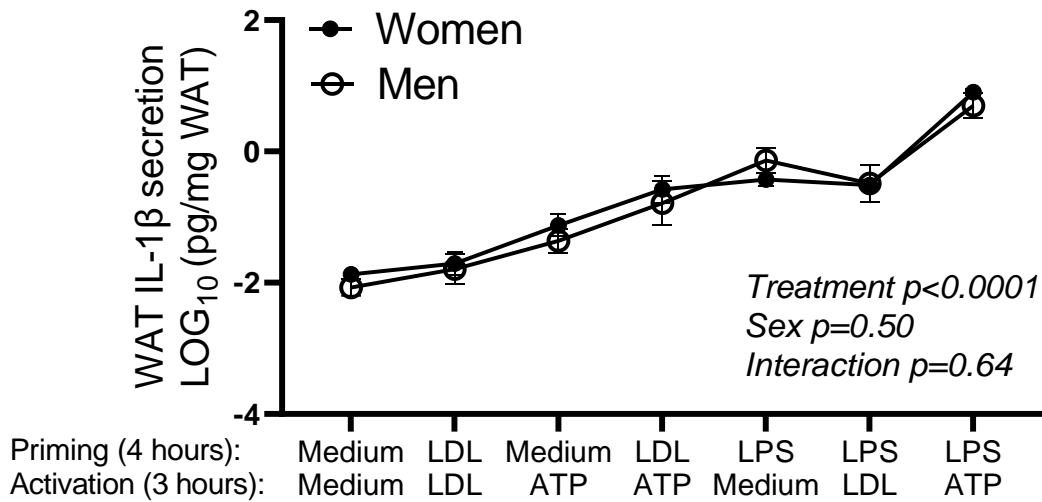

**Supplemental Figure 3:** Cytotoxic assay measuring LDH release into WAT medium induced by 5% FBS medium/medium (baseline or negative control), LDL/LDL, medium/ATP, LDL/ATP, LPS/medium, LPS/LDL, or LPS/ATP (positive control) for the priming/activation periods of the NLRP3 inflammasome. Also shown are LDH concentrations measured in WAT-free medium alone or supplemented with 1.2 g/L apoB incubated for 3 hours compared to the LDH positive control provided by the commercial kit (Invitrogen). Notably, LDL presence alone (without WAT) represent a modest false positive signal for LDH measurement above baseline (medium).

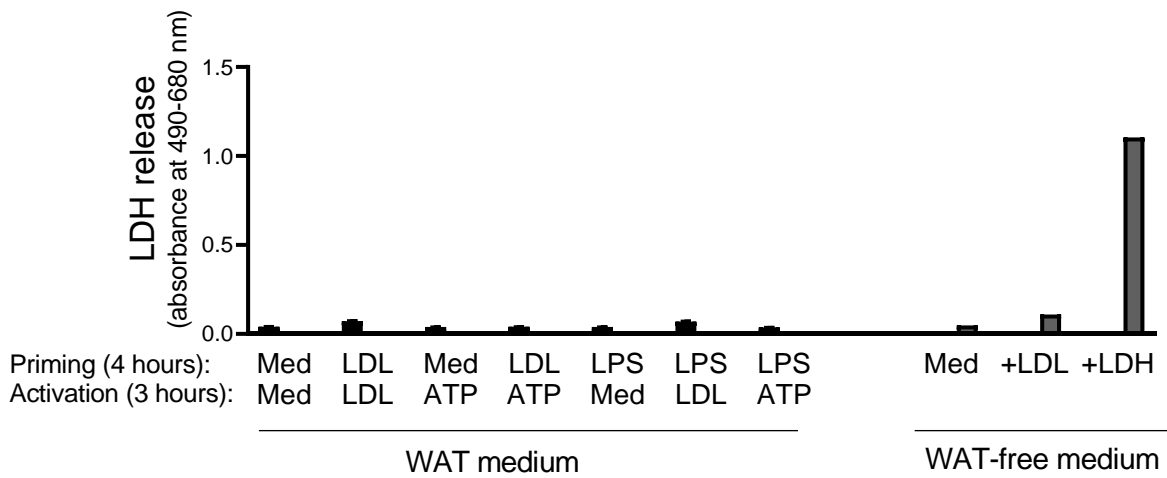

**Supplemental Figure 4:** Heat map representing Pearson correlation of subject weight, BMI, waist circumference, hip circumference, waist/hip ratio, android fat, gynoid fat, total body fat, android/gynoid fat ratio with fasting LOG<sub>10</sub> WAT IL-1 $\beta$ -secretion at baseline (medium/medium) and following incubation with LDL/LDL, medium/ATP, LDL/ATP, LPS/medium, LPS/LDL, or LPS/ATP for the priming/activation periods, and with LOG<sub>10</sub>WAT *NLRP3*, LOG<sub>10</sub>WAT *IL1B* mRNA and WAT pro-IL-1 $\beta$  protein in all subjects. N=40 for WAT mRNA and pro-IL-1 $\beta$  data and N=34 for all WAT IL-1 $\beta$ -secretion conditions except with LDL/LDL when N=31 for missing data. Grey cells represent insignificant and red cells represent significant positive correlations.

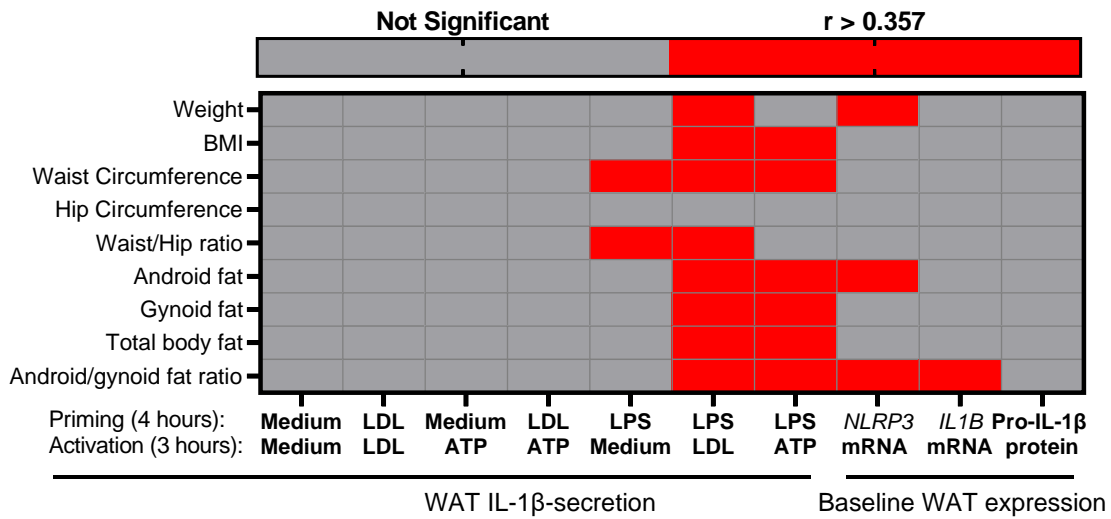

**Supplemental Figure 5:** Differences between subjects with low-apoB versus high-apoB in % fasting plasma phospholipid fatty acids. N=19 for low-apoB and N=20 for high-apoB for all fatty acids except for % C17:0 where N=5 for low and N=2 for high-apoB, % C16:1n-7 where N=16 for low-apoB, and % C18:3n-6 where N=18 for low and N=19 for high-apoB as the sample for one subject with low-apoB could not be measured and the named fatty acids were below detection limit of the GC-MS in some subjects.

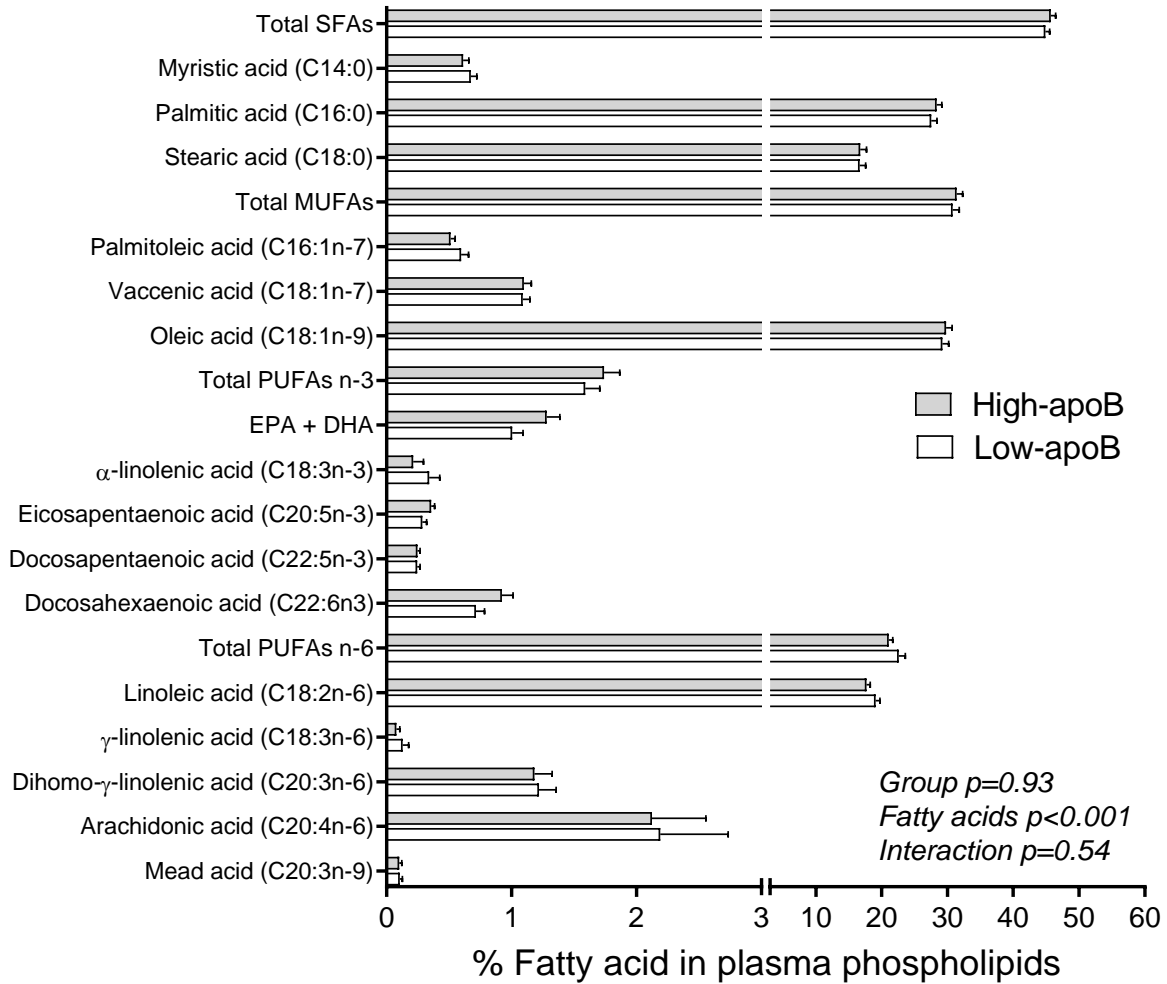

**Supplemental Figure 6:** Differences between subjects with low-apoB versus high-apoB in fasting baseline WAT mRNA expression of *ADIPOQ*, *PPARG*, *HMGCR*, *SREBP1C*, *SREBP2*, *LDLR*, and *CD36* normalized for *HPRT* (A), and of *MCP1*, *ADGRE1*, *IL10*, *NLRP3*, *CASP1*, and *IL1B* normalized for *HPRT* (B) analyzed by mixed-model analysis with group x gene interaction and presented as boxes with whiskers representing 10<sup>th</sup> – 90<sup>th</sup> percentile and line at the average. N=20 for low and N=20 for high plasma apoB.

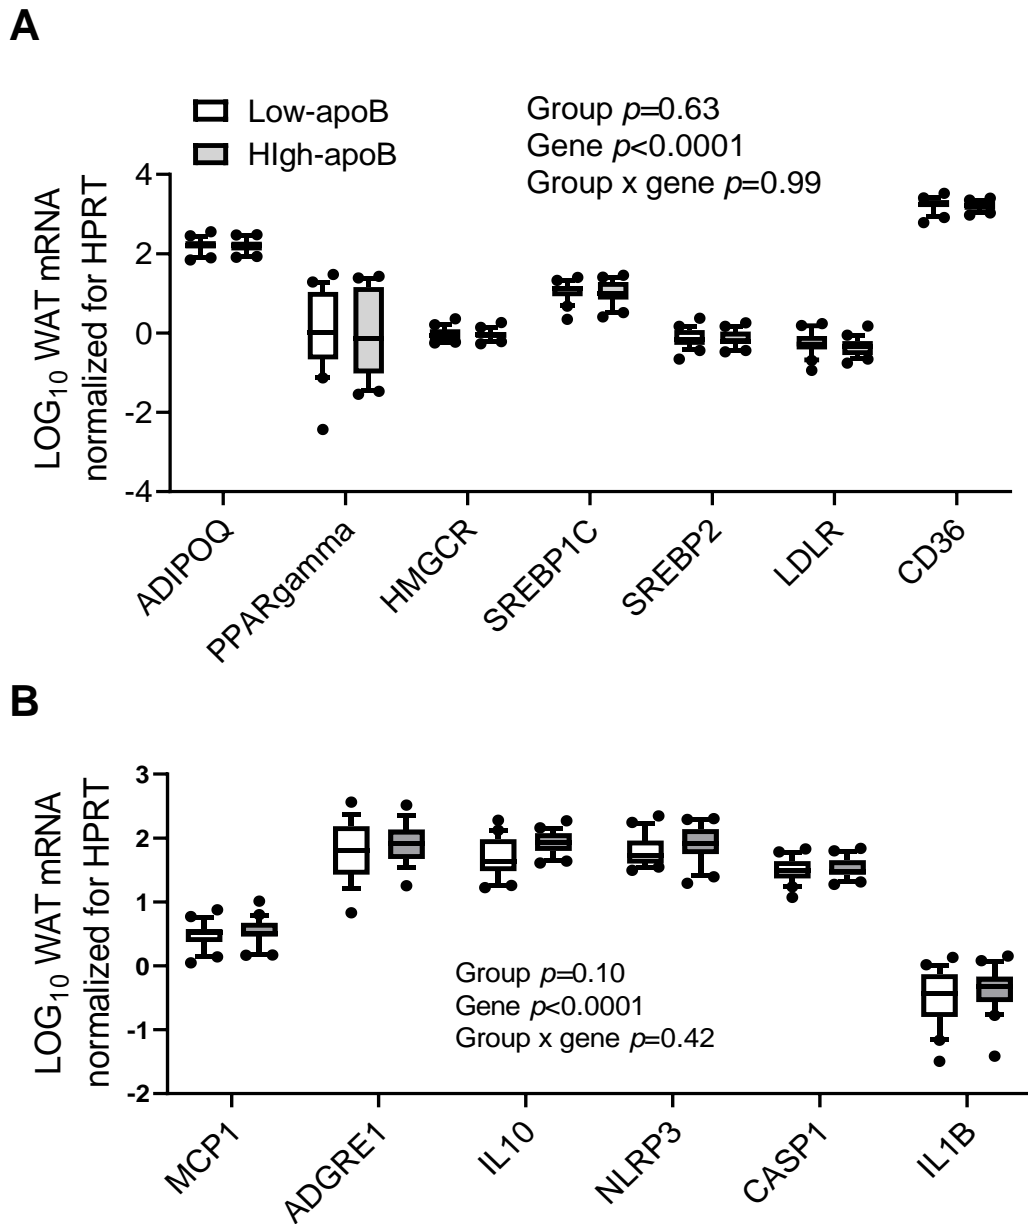

**Supplemental Figure 7:** Pearson correlation of fasting plasma apoB with 2<sup>nd</sup> phase GIIS<sub>IVGTT</sub> (A), total GIIS<sub>IVGTT</sub> (B), 2<sup>nd</sup> phase C-peptide secretion<sub>IVGTT</sub> (C), total C-peptide secretion<sub>IVGTT</sub> (D), insulin sensitivity as  $M/I_{clamp}$  (E), fasting plasma IL-1Ra (F), AUC<sub>6hr</sub> plasma TG (G) and AUC<sub>6hr</sub> plasma apoB48 (H) in women (N=27, closed circles, dotted regression line) and men (N=13, open circles, dashed regression line) except for panels A-D where N=11 men and panel E where N=12 men for missing data. Solid regression line represents pooled data for both sexes.

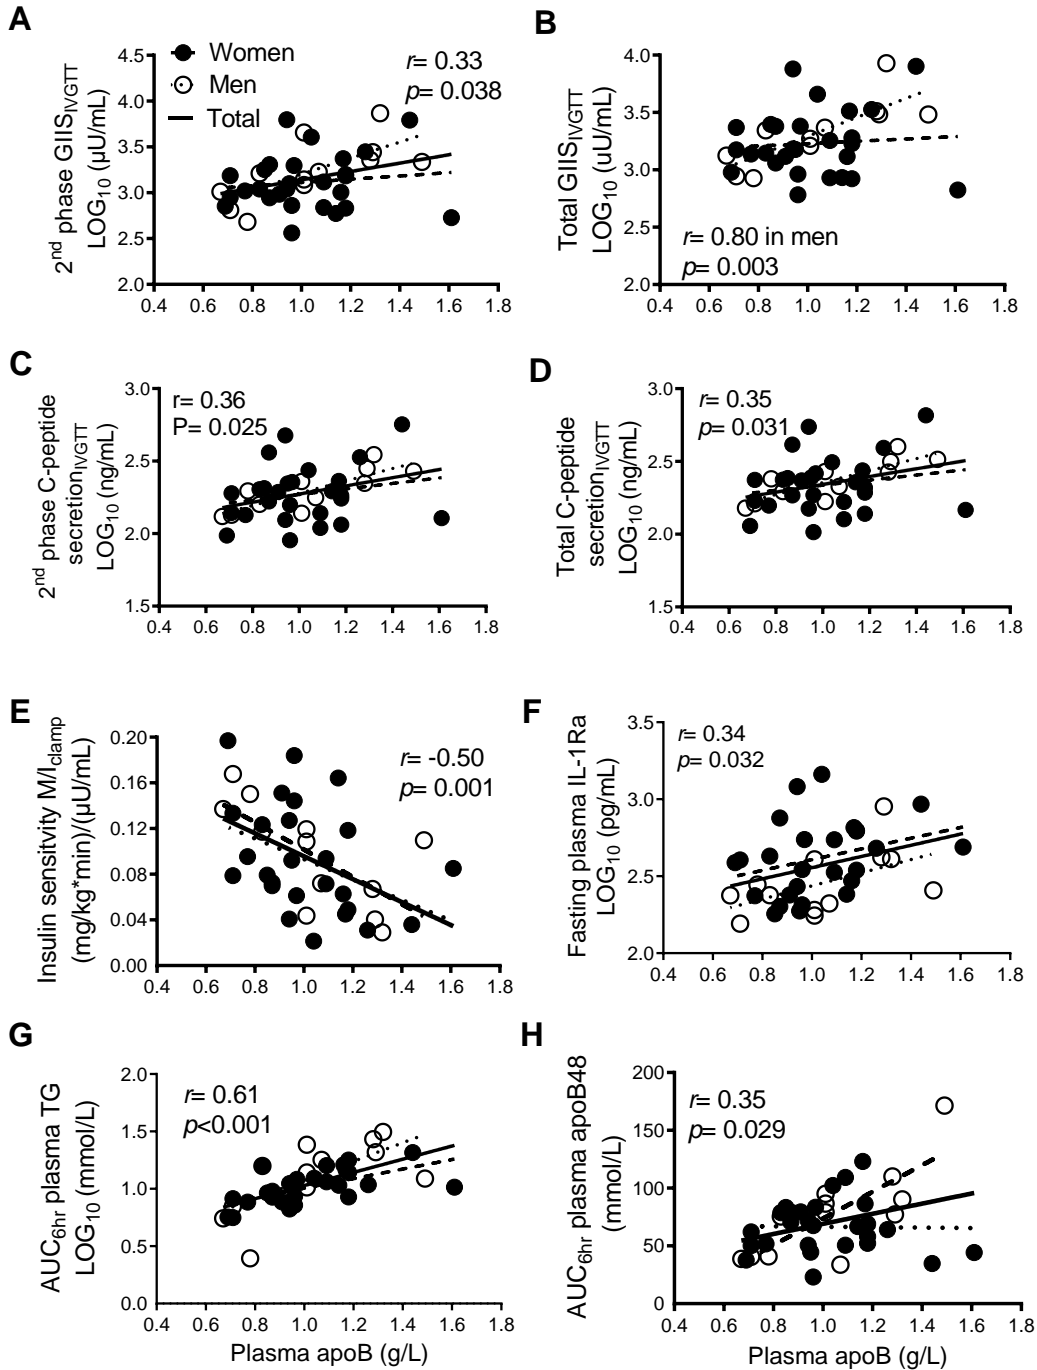



**Supplemental Figure 8:** Pearson correlation of fasting WAT IL-1 $\beta$ -secretion induced by LPS/LDL with 2<sup>nd</sup> phase GIIS<sub>IVGTT</sub> (A), total GIIS<sub>IVGTT</sub> (B), insulin sensitivity as  $M/I_{clamp}$  (C), AUC<sub>6hrs</sub> plasma apoB48 (D), AUC<sub>6hrs</sub> plasma TG (E), fasting baseline WAT mRNA expression of *ADIPOQ* (F) and *CD36* (G) normalized for *HPRT* and fasting plasma apoB (H), and estimated LDL size as LDL-C/apoB ratio (I) in subjects with low-apoB (N=15, open circles) and high-apoB (N=19, closed circles). Solid regression line represents correlation in all subjects.

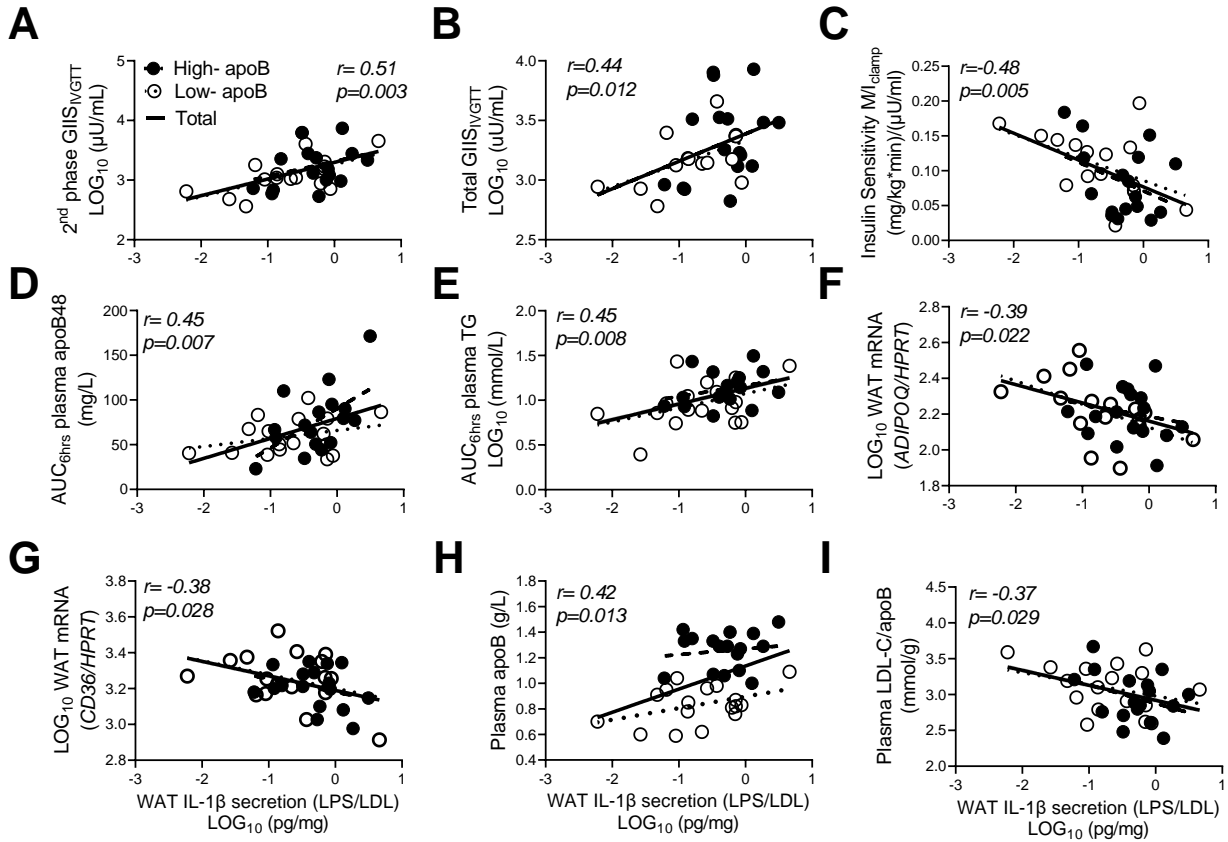

**Supplemental Figure 9:** Pearson correlation of fasting baseline WAT mRNA expression of *NLRP3* normalized for *HPRT* with 1<sup>st</sup> phase C-peptide secretion<sub>IVGTT</sub> (**A**), 2<sup>nd</sup> phase C-peptide secretion<sub>IVGTT</sub> (**B**), total C-peptide secretion<sub>IVGTT</sub> (**C**), insulin sensitivity as  $M/I_{clamp}$  (**D**), total disposition index (total C-peptide<sub>IVGTT</sub> x  $M/I_{clamp}$ ) (**E**), AUC<sub>6hrs</sub> plasma TG (**F**), fasting plasma IL-1Ra (**G**), TG (**H**), apoB/PCSK9 ratio (**I**), LDL-C/apoB ratio (**J**), and HDL-C (**K**), fasting baseline WAT mRNA expression of *PPARG* (**L**), *ADIPOQ* (**M**), *CD36* (**N**), *SREBP2* (**O**), *MCP1* (**P**), *ADGRE1* (**Q**), and *IL1B* (**R**) normalized to *HPRT*, and % fasting plasma phospholipid palmitate (**S**), arachidonate (**T**) and stearate (**U**) in subjects with low-apoB (N=20, open circles, dotted regression line) and high-apoB (N=20, closed circles, dashed regression line). Solid regression line represents pooled data for all subjects.

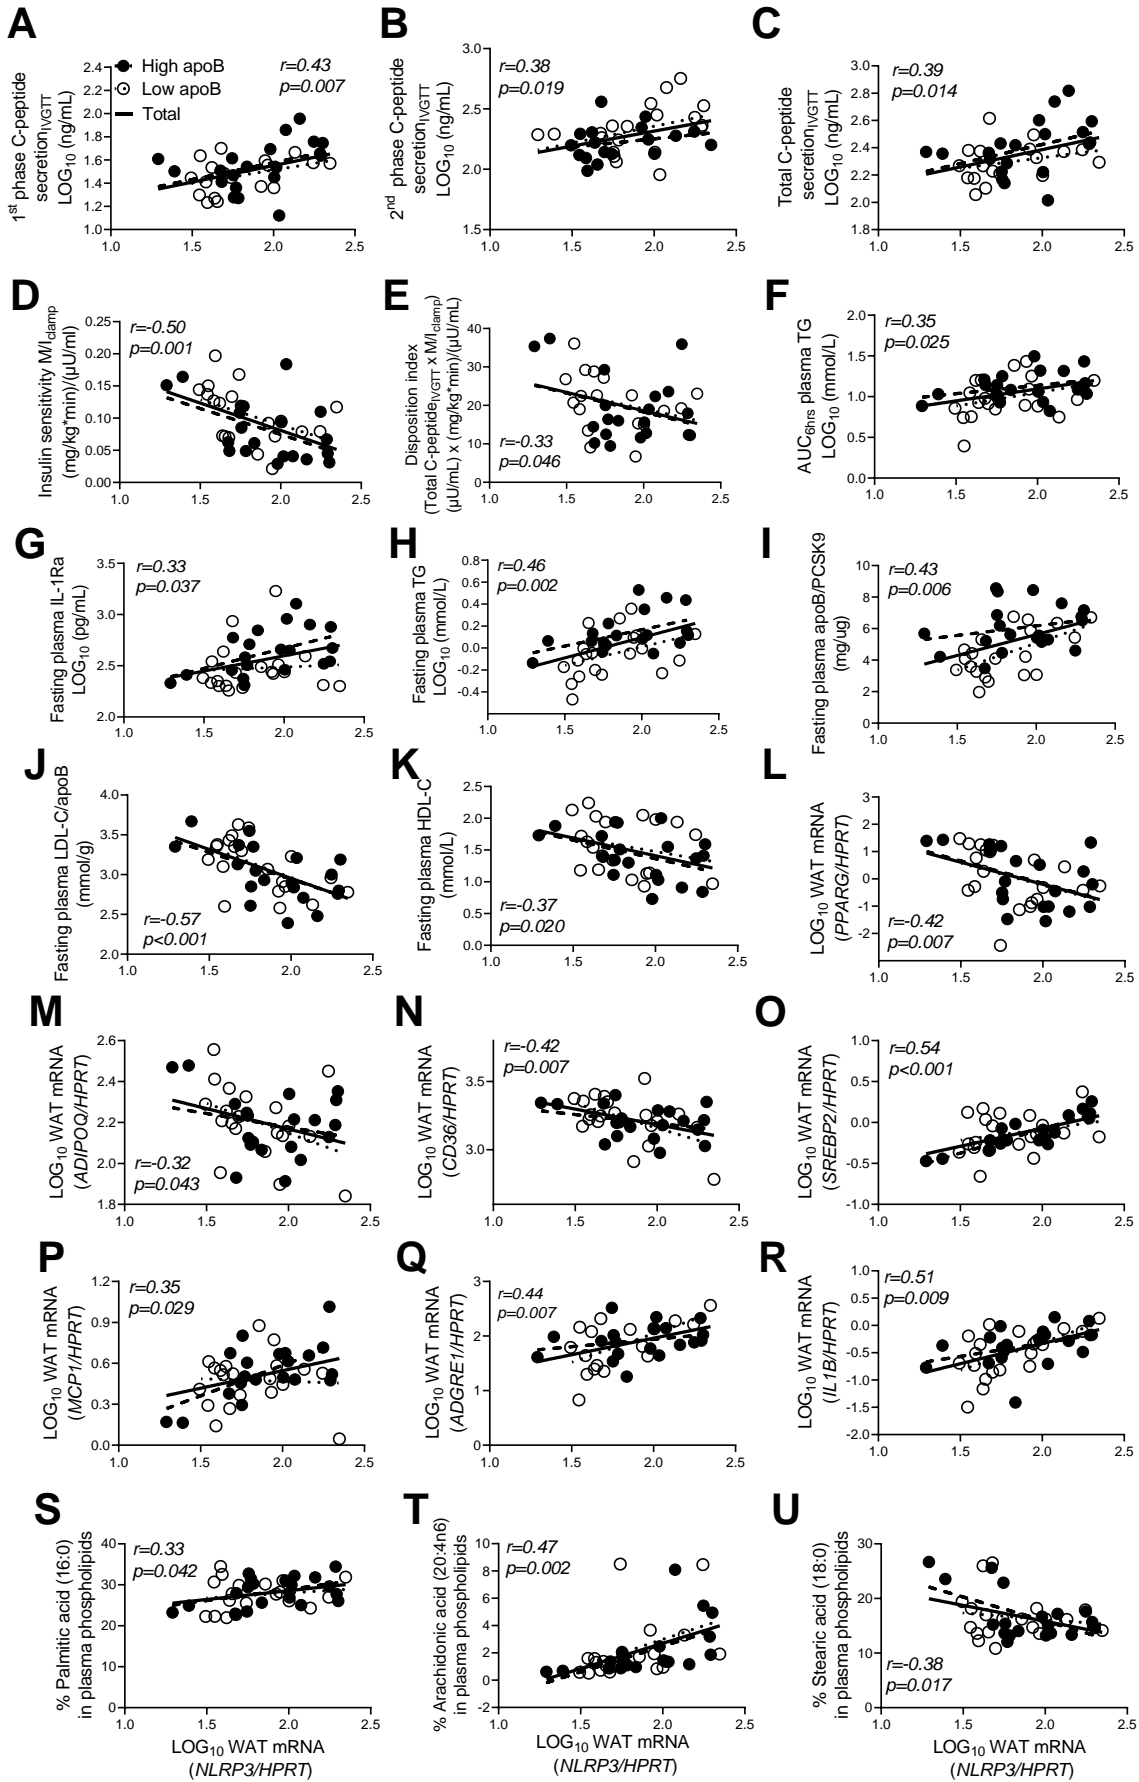

Supplement: 41598_2023_45870_MOESM1_ESM.pdf [file 41598_2023_45870_MOESM1_ESM.pdf]
